# Supplementary material for: Effects of Alpha-Synuclein Targeted Antisense Oligonucleotides on Lewy Body-Like Pathology and Behavioral Disturbances Induced by Injections of Pre-Formed Fibrils in the Mouse Motor Cortex
Source: PubMed Central journal article supplement — J Parkinsons Dis. 2021 Aug 2;11(3):1091–115. doi: 10.3233/JPD-212566 (PMC8461707; doi:10.3233/jpd-212566), 2021-08-02

# Supplementary Material

## Effects of Alpha-Synuclein Targeted Antisense Oligonucleotides on Lewy Body-Like Pathology and Behavioral Disturbances Induced by Injections of Pre-Formed Fibrils in the Mouse Motor Cortex

**Supplementary Figure 1. Fear conditioning data at 3 mpi.** A) Baseline motion before any tones or shocks during training day. An independent samples t-test did not reveal a difference based on PFF status ( $p = 0.428$ ). B) Average motion during the shocks on training day. A repeated measures ANOVA indicated that both groups reacted similarly to the tones ( $p = 0.708$ ). C) Percent time spent freezing during the tones on training day. A repeated measures ANOVA indicated that both groups froze similarly to the tone ( $p = 0.403$ ). D) Percent time spent freezing during the inter-stimulus intervals on training day. A repeated measures ANOVA indicated that both groups froze similarly during the intervals ( $p = 0.616$ ). E) Total percent time freezing during the 5 min contextual recall test. An independent samples t-test did not show any differences between Mono and PFF mice ( $p = 0.772$ ). F) Percent time spent freezing during the baseline and tone in the cued recall test. A repeated measures ANOVA did not reveal differences in response to the tone ( $p = 0.409$ ).

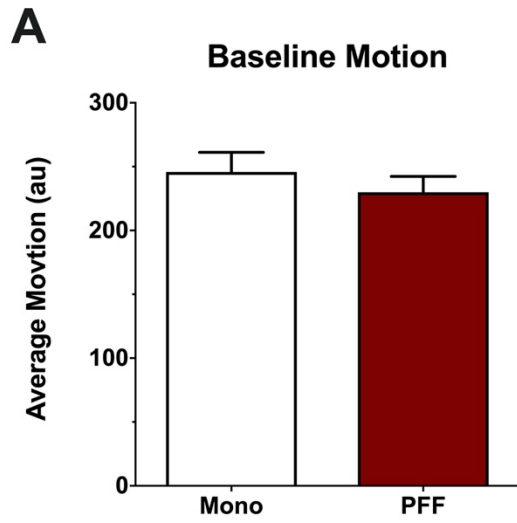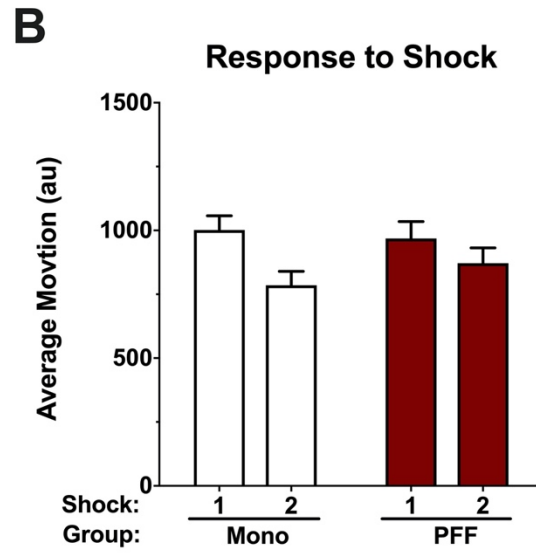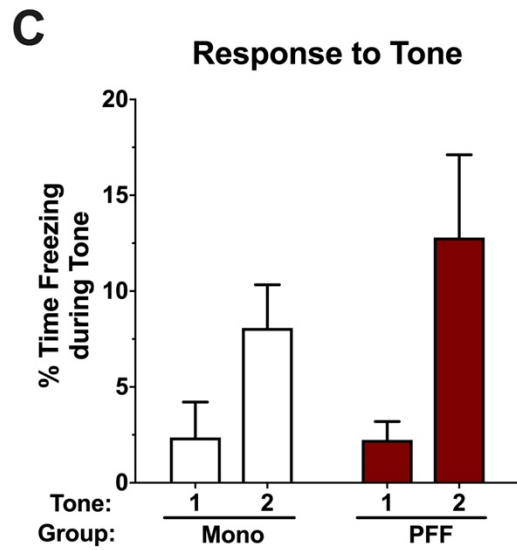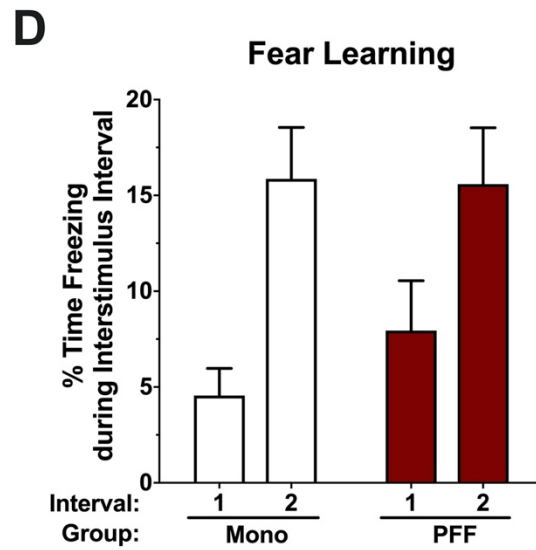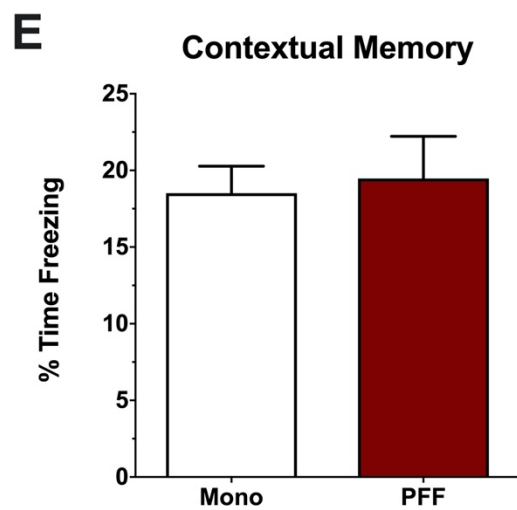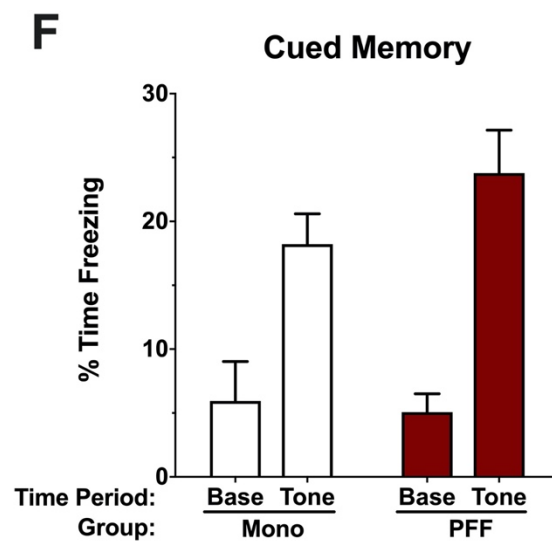

**Supplementary Figure 2. Average velocity during the water maze.** A-D) Average velocity during the water maze at 3 mpi (left) and 6 mpi (right). We found a significant time-by-ASO interaction during the hidden platform locations ( $F(7.527,218.278) = 3.705, p < 0.01$ ) and the visible platform locations ( $F(1.507,43.716) = 3.864, p < 0.05$ ). There were no effects of PFF on swim speeds. E) Averaged velocity across the platform locations. ASO animals swam slower following treatment than Scramble animals ( $p < 0.05$ ). No differences were detected prior to ASO delivery. F) Average velocity during the probe trials before and after ASO delivery. A significant time by ASO interaction ( $F(3.025,87.736) = 9.452, p < 0.0001$ ) indicated that ASO mice swam slower after delivery. We also found a trend toward a time by PFF interaction ( $F(3.025,87.736) = 2.397, p = 0.073$ ) and a trend towards a main effect of PFF ( $F(1,29) = 4.003, p = 0.055$ ). \* $p < 0.05$ . & $p < 0.05$ , Time\*ASO.

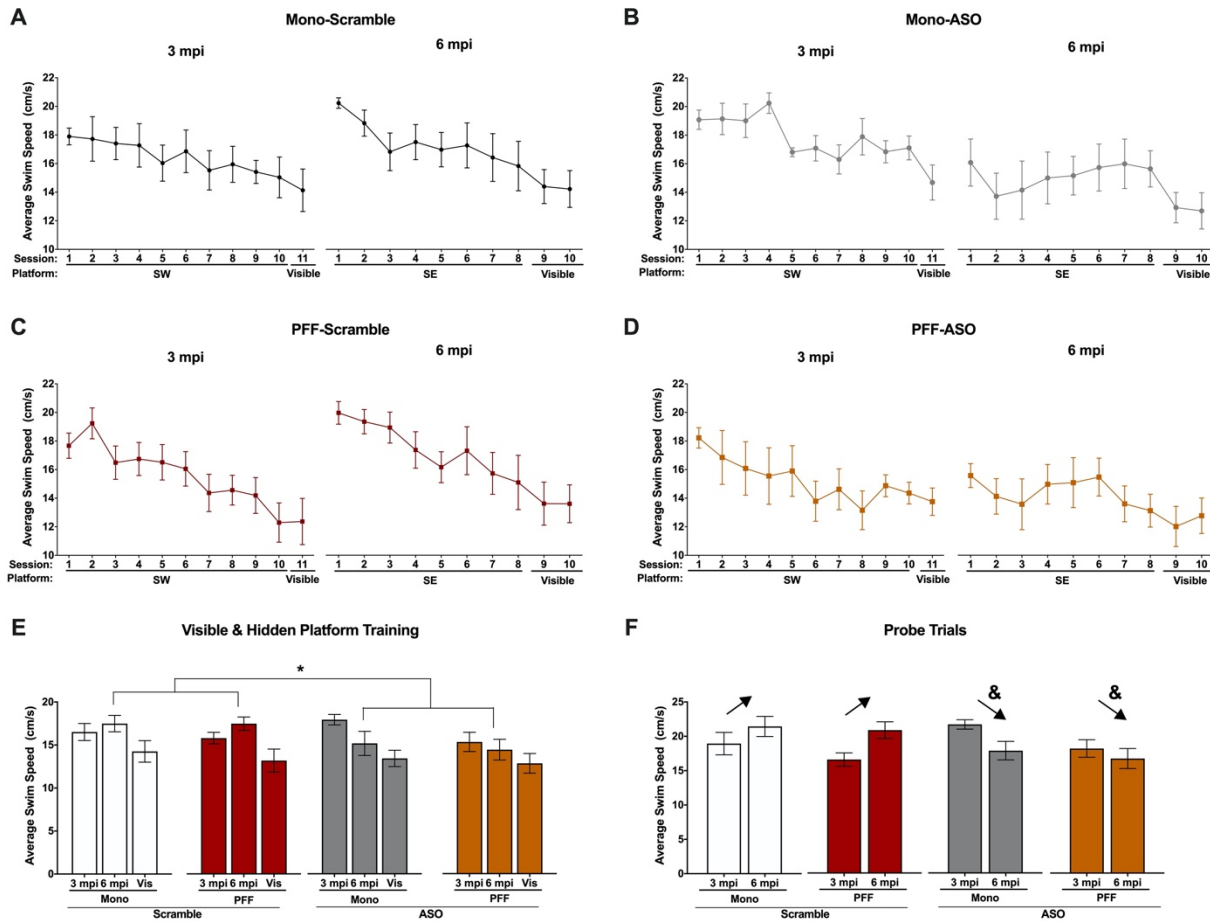

Supplement: jpd-11-jpd212566-s001.pdf [file jpd-11-jpd212566-s001.pdf]
